# Supplementary material for: Emergency Department Visits and Summer Temperatures in Bologna, Northern Italy, 2010–2019: A Case-Crossover Study and Geographically Weighted Regression Methods
Source: MDPI journal article supplement (doi:10.3390/ijerph192315592), 2022-11-24
Supplement: s1 [file s1]

## Supplementary material

**Table S1.** List of variables used in the case-crossover analysis and level of availability

| variable                                                   | Level available    |
|------------------------------------------------------------|--------------------|
| EDV (outcome)                                              | Individual         |
| Mean apparent Temperature (exposure)                       | Daily base         |
| Age-class (potential effect modifier)                      | Individual         |
| Sex (potential effect modifier)                            | Individual         |
| Town-district (potential effect modifier)                  | Individual         |
| Deprivation index (potential effect modifier)              | Census block level |
| Microclimatic discomfort index (potential effect modifier) | Urban block level  |
| Population density (time-variant)                          | Daily base         |

**Table S2.** Log-likelihood values by temperature cut-off points

| Temperature cut-off (°C) | Log-likelihood |
|--------------------------|----------------|
| 15                       | -385,532.06    |
| 16                       | -385,532.11    |
| 17                       | -385,532.15    |
| 18                       | -385,532.11    |
| 19                       | -385,532.10    |
| 20                       | -385,531.95    |
| 21                       | -385,531.96    |
| 22                       | -385,531.84    |
| 23                       | -385,531.77    |
| 24                       | -385,531.66    |
| 25                       | -385,531.58    |
| 26                       | -385,531.41    |
| 27                       | -385,531.42    |
| 28                       | -385,531.63    |
| 29                       | -385,531.73    |
| 30                       | -385,532.13    |
